# Supplementary material
Source: PubMed Central journal article supplement (PMC5124105)
Supplement: rspb20162111supp1.pdf [file rspb20162111supp1.pdf]

|                                    |               |
|------------------------------------|---------------|
| <i>Erythrolamprus mimus</i>        | LAGTEDDPTRDN  |
| Hydrophobicity                     |               |
| PI                                 |               |
| <i>Erythrolamprus aesculapii</i>   | LAGTEDDPTRDN  |
| Hydrophobicity                     |               |
| PI                                 |               |
| <i>Xenodon semicinctus</i>         | LAGTEDDPTRDN  |
| Hydrophobicity                     |               |
| PI                                 |               |
| <i>Xenodon neuwiedii</i>           | LAGTEDDPTRDN  |
| Hydrophobicity                     |               |
| PI                                 |               |
| <i>Xenodon merremi</i>             | LAGTEDDPTRDN  |
| Hydrophobicity                     |               |
| PI                                 |               |
| <i>Philodryas olfersii</i>         | LAGTEDDPTRDN  |
| Hydrophobicity                     |               |
| PI                                 |               |
| <i>Clelia clelia</i>               | LAGTEDDPTRDN  |
| Hydrophobicity                     |               |
| PI                                 |               |
| <i>Oxyrhopus formosus</i>          | LAGTEDEPTRDN  |
| Hydrophobicity                     |               |
| PI                                 |               |
| <i>Hydrodynastes gigas</i>         | LAGTEDDPSTRDN |
| Hydrophobicity                     |               |
| PI                                 |               |
| <i>Helicops angulatus</i>          | LAGTEDDPTRDN  |
| Hydrophobicity                     |               |
| PI                                 |               |
| <i>Conopsis vittatus</i>           | LAGTEDDPTRDN  |
| Hydrophobicity                     |               |
| PI                                 |               |
| <i>Dipsas catesbyi</i>             | LAGTEDDPSTRDN |
| Hydrophobicity                     |               |
| PI                                 |               |
| <i>Atractus flammigerus</i>        | LAGTEDDPSTRDN |
| Hydrophobicity                     |               |
| PI                                 |               |
| <i>Leptodeira septentrionalis</i>  | LAGTEDDPSTRDN |
| Hydrophobicity                     |               |
| PI                                 |               |
| <i>Hypsiglena torquata</i>         | LAGTEDDPSTRDN |
| Hydrophobicity                     |               |
| PI                                 |               |
| <i>Farancia abacura</i>            | QAGTEDDPAGDN  |
| Hydrophobicity                     |               |
| PI                                 |               |
| <i>Diadophis punctatus</i>         | QAGTEDDPAGDN  |
| Hydrophobicity                     |               |
| PI                                 |               |
| <i>Carphophis amoenus</i>          | QAGTEDDPAGDN  |
| Hydrophobicity                     |               |
| PI                                 |               |
| <i>Contia tenuis</i>               | QAGMEDNPSGDN  |
| Hydrophobicity                     |               |
| PI                                 |               |
| <i>Heterodon simus</i>             | LAGTEDDPSTRDN |
| Hydrophobicity                     |               |
| PI                                 |               |
| <i>Heterodon nasicus</i>           | LAGTEDDPSTRDN |
| Hydrophobicity                     |               |
| PI                                 |               |
| <i>Heterodon platirhinos</i>       | LAGTEDDPSTRDN |
| Hydrophobicity                     |               |
| PI                                 |               |
| <i>Thamnophis radix</i>            | LAATEDDPSTRDN |
| Hydrophobicity                     |               |
| PI                                 |               |
| <i>Thamnophis butleri</i>          | LAATEDDPSTRDN |
| Hydrophobicity                     |               |
| PI                                 |               |
| <i>Thamnophis brachystoma</i>      | LAATEDDPSTRDN |
| Hydrophobicity                     |               |
| PI                                 |               |
| <i>Thamnophis elegans</i>          | LAATEDDPSTRDN |
| Hydrophobicity                     |               |
| PI                                 |               |
| <i>Thamnophis atratus</i>          | LAATEDDPSTRDN |
| Hydrophobicity                     |               |
| PI                                 |               |
| <i>Thamnophis couchi</i>           | LAATEDDPSTRDN |
| Hydrophobicity                     |               |
| PI                                 |               |
| <i>Thamnophis ordinoides</i>       | LAATEDDPSTRDN |
| Hydrophobicity                     |               |
| PI                                 |               |
| <i>Thamnophis maricanus</i>        | LAATEDDPSTRDN |
| Hydrophobicity                     |               |
| PI                                 |               |
| <i>Thamnophis cyrtopsis</i>        | LAATEDDPSTRDN |
| Hydrophobicity                     |               |
| PI                                 |               |
| <i>Thamnophis melanogaster</i>     | LAGTEDDPSTRDN |
| Hydrophobicity                     |               |
| PI                                 |               |
| <i>Thamnophis sauritus</i>         | LAATEDDPSTRDN |
| Hydrophobicity                     |               |
| PI                                 |               |
| <i>Thamnophis proximus</i>         | LAATEDDPSTRDN |
| Hydrophobicity                     |               |
| PI                                 |               |
| <i>Thamnophis sirtalis</i>         | LAATEDDPSTRDN |
| Hydrophobicity                     |               |
| PI                                 |               |
| <i>Nerodia fasciata</i>            | LAATEDDPSTRDN |
| Hydrophobicity                     |               |
| PI                                 |               |
| <i>Nerodia sipedon</i>             | LAATEDDPSTRDN |
| Hydrophobicity                     |               |
| PI                                 |               |
| <i>Nerodia rhombifer</i>           | LAATEDDPSTRDN |
| Hydrophobicity                     |               |
| PI                                 |               |
| <i>Nerodia cyclopion</i>           | LAATEDDPSTRDN |
| Hydrophobicity                     |               |
| PI                                 |               |
| <i>Regina grahamii</i>             | LAATEDDPSTRDN |
| Hydrophobicity                     |               |
| PI                                 |               |
| <i>Regina septemvittata</i>        | LAATEDDPSTRDN |
| Hydrophobicity                     |               |
| PI                                 |               |
| <i>Storeria occipitomaculata</i>   | LAATEDDPSTRDN |
| Hydrophobicity                     |               |
| PI                                 |               |
| <i>Storeria dekayi</i>             | LAATEDDPSTRDN |
| Hydrophobicity                     |               |
| PI                                 |               |
| <i>Regina alleni</i>               | LAATEDDPSTRDN |
| Hydrophobicity                     |               |
| PI                                 |               |
| <i>Regina rigida</i>               | LAATEDDPSTRDN |
| Hydrophobicity                     |               |
| PI                                 |               |
| <i>Natrix natrix</i>               | LAATEDDPSTRDN |
| Hydrophobicity                     |               |
| PI                                 |               |
| <i>Natrix tessellata</i>           | LAATEDDPSTRDN |
| Hydrophobicity                     |               |
| PI                                 |               |
| <i>Natrix maura</i>                | LAATEDDPSTRDN |
| Hydrophobicity                     |               |
| PI                                 |               |
| <i>Sinonatrix percarinata</i>      | QAGTEEDPAGDN  |
| Hydrophobicity                     |               |
| PI                                 |               |
| <i>Sinonatrix annularis</i>        | QAGTEEDPAGDN  |
| Hydrophobicity                     |               |
| PI                                 |               |
| <i>Xenochrophis piscator</i>       | LAGTEDDPSTRDN |
| Hydrophobicity                     |               |
| PI                                 |               |
| <i>Amphisma stolatum</i>           | LAGTEDDPSTRDN |
| Hydrophobicity                     |               |
| PI                                 |               |
| <i>Rhabdophis leonardi</i>         | LAGTEDDPSTRDN |
| Hydrophobicity                     |               |
| PI                                 |               |
| <i>Rhabdophis tigrinus</i>         | LAGTEDDPSTRDN |
| Hydrophobicity                     |               |
| PI                                 |               |
| <i>Rhabdophis subminiatus</i>      | LAGTEDDPSTRDN |
| Hydrophobicity                     |               |
| PI                                 |               |
| <i>Macropisthodon rudis</i>        | LAGTEEDPSTRDN |
| Hydrophobicity                     |               |
| PI                                 |               |
| <i>Lampropeltis getula</i>         | QAGTEEDPAGDN  |
| Hydrophobicity                     |               |
| PI                                 |               |
| <i>Lampropeltis calligaster</i>    | QAGTEEDPAGDN  |
| Hydrophobicity                     |               |
| PI                                 |               |
| <i>Pantherophis obsoletus</i>      | QAGTEEDPAGDN  |
| Hydrophobicity                     |               |
| PI                                 |               |
| <i>Pantherophis alleghaniensis</i> | QAGTEEDPAGDN  |
| Hydrophobicity                     |               |
| PI                                 |               |
| <i>Pituophis catenifer</i>         | QAGTEEDPAGDN  |
| Hydrophobicity                     |               |
| PI                                 |               |
| <i>Elaphe quadrivirgata</i>        | QAGTEEDPSGDN  |
| Hydrophobicity                     |               |
| PI                                 |               |
| <i>Euprepophis conspicillatus</i>  | QAGTEEDPAGDN  |
| Hydrophobicity                     |               |
| PI                                 |               |
| <i>Drymarchon corais</i>           | LAGTEDDPSTRDN |
| Hydrophobicity                     |               |
| PI                                 |               |
| <i>Coluber constrictor</i>         | QAGTEEDPAGDN  |
| Hydrophobicity                     |               |
| PI                                 |               |
| <i>Dasypeltis scabra</i>           | QAVTEEDPAGDN  |
| Hydrophobicity                     |               |
| PI                                 |               |
| <i>Boiga irregularis</i>           | QAGTEEDPAGDN  |
| Hydrophobicity                     |               |
| PI                                 |               |
| <i>Lycodon rufozonatus</i>         | LAGTEEDPSTRDN |
| Hydrophobicity                     |               |
| PI                                 |               |
| <i>Cyclophiops semicarinatus</i>   | QAGTEEDPAGDN  |
| Hydrophobicity                     |               |
| PI                                 |               |
| <i>Dendrelaphis punctulatus</i>    | QAGTEEDPAGDN  |
| Hydrophobicity                     |               |
| PI                                 |               |
| <i>Dendrelaphis subocularis</i>    | QAGTEEDPAGDN  |
| Hydrophobicity                     |               |
| PI                                 |               |
| <i>Hemiaspis signata</i>           | QAGTEEDPSGDN  |
| Hydrophobicity                     |               |
| PI                                 |               |
| <i>Pseudechis australis</i>        | QAGTEEDPSGDN  |
| Hydrophobicity                     |               |
| PI                                 |               |
| <i>Acanthophis praelongus</i>      | QAGTEEDPSGDN  |
| Hydrophobicity                     |               |
| PI                                 |               |
| <i>Naja nigricollis</i>            | LAGTEDDPSTRDN |
| Hydrophobicity                     |               |
| PI                                 |               |
| <i>Naja melanoleuca</i>            | LAGTEDDPSTRDN |
| Hydrophobicity                     |               |
| PI                                 |               |
| <i>Naja naja</i>                   | LAGTEEDPSTRDN |
| Hydrophobicity                     |               |
| PI                                 |               |
| <i>Naja atra</i>                   | LAGTEEDPSTRDN |
| Hydrophobicity                     |               |
| PI                                 |               |
| <i>Hemachatus haemachatus</i>      | LAGTEEDPSTRDN |
| Hydrophobicity                     |               |
| PI                                 |               |
| <i>Dendroaspis angusticeps</i>     | QAGTEEDPSGDN  |
| Hydrophobicity                     |               |
| PI                                 |               |
| <i>Dendroaspis polylepis</i>       | QAGTEEDPSGDN  |
| Hydrophobicity                     |               |
| PI                                 |               |
| <i>Ophiophagus hannah</i>          | QAGTEEDPSGDN  |
| Hydrophobicity                     |               |
| PI                                 |               |
| <i>Boaedon fuliginosus</i>         | QAGTEEDPSGDN  |
| Hydrophobicity                     |               |
| PI                                 |               |
| <i>Hypsigopus plumbea</i>          | QAGTEEDPSGDN  |
| Hydrophobicity                     |               |
| PI                                 |               |
| <i>Crotalus atrox</i>              | LAATEDDPSTRDN |
| Hydrophobicity                     |               |
| PI                                 |               |
| <i>Sistrurus catenatus</i>         | QAGTEEDPAGDN  |
| Hydrophobicity                     |               |
| PI                                 |               |
| <i>Agkistrodon contortrix</i>      | LAGTEDDPSTRDN |
| Hydrophobicity                     |               |
| PI                                 |               |
| <i>Viridovipera stejnegeri</i>     | QVGTEEDPAGDN  |
| Hydrophobicity                     |               |
| PI                                 |               |
| <i>Bitis nasicornis</i>            | LAVTEDDPSTRDN |
| Hydrophobicity                     |               |
| PI                                 |               |
| <i>Bitis arietans</i>              | LAVTEDDPSTRDN |
| Hydrophobicity                     |               |
| PI                                 |               |
| <i>Cerastes cerastes</i>           | LAGTEDDPTRDN  |
| Hydrophobicity                     |               |
| PI                                 |               |
| <i>Causus maculatus</i>            | LAGTEDDPSTRDN |
| Hydrophobicity                     |               |
| PI                                 |               |
| <i>Vipera berus</i>                | QAGTEEDPSGDN  |
| Hydrophobicity                     |               |
| PI                                 |               |
| <i>Vipera aspis</i>                | QVGTEEDPAGDN  |
| Hydrophobicity                     |               |
| PI                                 |               |
| <i>Acrochordus arafurae</i>        | QAGTEEDPAGDN  |
| Hydrophobicity                     |               |
| PI                                 |               |
| <i>Morelia spilota</i>             | QAGTEEDPSGDN  |
| Hydrophobicity                     |               |
| PI                                 |               |
| <i>Liasis fuscus</i>               | QAGTEEDPSGDN  |
| Hydrophobicity                     |               |
| PI                                 |               |
| <i>Python regius</i>               | QAGTEEDPSGDN  |
| Hydrophobicity                     |               |
| PI                                 |               |
| <i>Python molurus</i>              | QAATGEEPNNNDN |
| Hydrophobicity                     |               |
| PI                                 |               |
| <i>Epictia albipuncta</i>          | LAATEDDPSTRDN |
| Hydrophobicity                     |               |
| PI                                 |               |

**Figure S1.** List of amino acid sequences for the H1-H2 extracellular loop of all species analyzed in this study, generated by Geneious v. 6.1.8 (Biomatters Ltd.). The hydrophobicity and isoelectric point (PI) of each residue is indicated below each sequence. The Q111L mutation results in increased hydrophobicity and the G120R mutation results in increased PI.

**Table S1.** Snake species included in this study, indicating the presence or absence of the resistance mutations of Na<sup>+</sup>/K<sup>+</sup>-ATPase and the presence or absence of toads in the diet. The dietary data are compiled almost exclusively from primary literature, a large portion of which includes comprehensive dietary studies rather than anecdotal observations. We considered most secondary literature to be unreliable for accurate dietary data. Due to the imperfect nature of dietary studies, we have taken a conservative approach and consider a species bufophagous if it is a generalist predator and there exists a record of at least one individual consuming a toad (i.e., marked “Yes” under “Toad in Diet”). Furthermore, we considered a bufadienolide-resistant snake bufophagous if it is a generalist predator with a high frequency of amphibians in the diet, even though there are no published records of toads. Bufadienolide-resistant species that are not considered bufophagous include primarily species with dietary specializations that do not include amphibians. Asterisks indicate species with diets including >80% toads or those that sequester dietary bufadienolides.

| <b>Species</b>                   | <b>Resistance Mutations</b> | <b>Toad in Diet</b> | <b>References</b> |
|----------------------------------|-----------------------------|---------------------|-------------------|
| <i>Erythrolamprus mimus</i>      | <b>Yes</b>                  | <b>No</b>           | [1–2]             |
| <i>Erythrolamprus aesculapii</i> | <b>Yes</b>                  | <b>No</b>           | [1,3–8]           |
| <i>Xenodon semicinctus</i>       | <b>Yes</b>                  | <b>Yes</b>          | [4]               |

|                                   |            |             |               |
|-----------------------------------|------------|-------------|---------------|
| <i>Xenodon neuwiedii</i>          | <b>Yes</b> | <b>Yes</b>  | [9–12]        |
| <i>Xenodon merremi</i>            | <b>Yes</b> | <b>Yes*</b> | [9–10,13–12]  |
| <i>Philodryas olfersii</i>        | <b>Yes</b> | <b>No</b>   | [7,14–18]     |
| <i>Clelia clelia</i>              | <b>Yes</b> | <b>No</b>   | [19]          |
| <i>Oxyrhopus formosus</i>         | <b>Yes</b> | <b>No</b>   | [17–18]       |
| <i>Hydrodynastes gigas</i>        | <b>Yes</b> | <b>Yes</b>  | [20]          |
| <i>Helicops angulatus</i>         | <b>Yes</b> | <b>No</b>   | [7,14,21–24]  |
| <i>Conophis vittatus</i>          | <b>Yes</b> | <b>No</b>   | [25]          |
| <i>Dipsas catesbyi</i>            | <b>Yes</b> | <b>No</b>   | [23,26–27]    |
| <i>Atractus flammigerus</i>       | <b>Yes</b> | <b>No</b>   | [15]          |
| <i>Leptodeira septentrionalis</i> | <b>Yes</b> | <b>Yes</b>  | [28–30]       |
| <i>Hypsiglena torquata</i>        | <b>Yes</b> | <b>Yes</b>  | [31]          |
| <i>Farancia abacura</i>           | <b>No</b>  | <b>No</b>   | [32–33]       |
| <i>Diadophis punctatus</i>        | <b>No</b>  | <b>No</b>   | [34–35]       |
| <i>Carphophis amoenus</i>         | <b>No</b>  | <b>No</b>   | [34]          |
| <i>Contia tenuis</i>              | <b>No</b>  | <b>No</b>   | [36]          |
| <i>Heterodon simus</i>            | <b>Yes</b> | <b>Yes</b>  | [37–38]       |
| <i>Heterodon nasicus</i>          | <b>Yes</b> | <b>Yes</b>  | [37–39]       |
| <i>Heterodon platirhinus</i>      | <b>Yes</b> | <b>Yes*</b> | [37,40–41]    |
| <i>Thamnophis radix</i>           | <b>Yes</b> | <b>No</b>   | [42–45]       |
| <i>Thamnophis butleri</i>         | <b>Yes</b> | <b>No</b>   | [46–47]       |
| <i>Thamnophis brachystoma</i>     | <b>Yes</b> | <b>No</b>   | [48–49]       |
| <i>Thamnophis elegans</i>         | <b>Yes</b> | <b>Yes</b>  | [12,50–51]    |
| <i>Thamnophis atratus</i>         | <b>Yes</b> | <b>Yes</b>  | [52–54]       |
| <i>Thamnophis couchii</i>         | <b>Yes</b> | <b>Yes</b>  | [55–56]       |
| <i>Thamnophis ordinoides</i>      | <b>Yes</b> | <b>No</b>   | [49,56]       |
| <i>Thamnophis marcianus</i>       | <b>Yes</b> | <b>Yes</b>  | [57]          |
| <i>Thamnophis cyrtopsis</i>       | <b>Yes</b> | <b>Yes</b>  | [58]          |
| <i>Thamnophis melanogaster</i>    | <b>Yes</b> | <b>No</b>   | [59–63]       |
| <i>Thamnophis sauritus</i>        | <b>Yes</b> | <b>Yes</b>  | [64]          |
| <i>Thamnophis proximus</i>        | <b>Yes</b> | <b>Yes</b>  | [57,65–67]    |
| <i>Thamnophis sirtalis</i>        | <b>Yes</b> | <b>Yes</b>  | [12,51,68–70] |
| <i>Nerodia fasciata</i>           | <b>Yes</b> | <b>Yes</b>  | [71–73]       |
| <i>Nerodia sipedon</i>            | <b>Yes</b> | <b>Yes</b>  | [34–35,74]    |
| <i>Nerodia rhombifer</i>          | <b>Yes</b> | <b>No</b>   | [71,74–76]    |
| <i>Nerodia cyclopion</i>          | <b>Yes</b> | <b>No</b>   | [74–75]       |
| <i>Regina grahami</i>             | <b>Yes</b> | <b>No</b>   | [71,74]       |
| <i>Regina septemvittata</i>       | <b>Yes</b> | <b>No</b>   | [74,77–78]    |

|                                    |            |             |                 |
|------------------------------------|------------|-------------|-----------------|
| <i>Storeria occipitomaculata</i>   | <b>Yes</b> | <b>No</b>   | [79–80]         |
| <i>Storeria dekayi</i>             | <b>Yes</b> | <b>No</b>   | [79,81]         |
| <i>Regina alleni</i>               | <b>Yes</b> | <b>No</b>   | [74,82–84]      |
| <i>Regina rigida</i>               | <b>Yes</b> | <b>No</b>   | [74–75]         |
| <i>Natrix natrix</i>               | <b>Yes</b> | <b>Yes</b>  | [85–88]         |
| <i>Natrix tessellata</i>           | <b>Yes</b> | <b>Yes</b>  | [86,89]         |
| <i>Natrix maura</i>                | <b>Yes</b> | <b>No</b>   | [90–91]         |
| <i>Sinonatrix percarinata</i>      | <b>No</b>  | <b>No</b>   | [92]            |
| <i>Sinonatrix annularis</i>        | <b>No</b>  | <b>No</b>   | [92]            |
| <i>Xenochrophis piscator</i>       | <b>Yes</b> | <b>Yes</b>  | [93]            |
| <i>Amphiesma stolatum</i>          | <b>Yes</b> | <b>No</b>   | [94]            |
| <i>Rhabdophis leonardi</i>         | <b>Yes</b> | <b>No</b>   | [95]            |
| <i>Rhabdophis tigrinus</i>         | <b>Yes</b> | <b>Yes*</b> | [96–98]         |
| <i>Rhabdophis subminiatus</i>      | <b>Yes</b> | <b>Yes</b>  | [99]            |
| <i>Macropisthodon rudis</i>        | <b>Yes</b> | <b>Yes</b>  | [100]           |
| <i>Lampropeltis getula</i>         | <b>No</b>  | <b>No</b>   | [66]            |
| <i>Lampropeltis calligaster</i>    | <b>No</b>  | <b>No</b>   | [35,66]         |
| <i>Pantherophis obsoletus</i>      | <b>No</b>  | <b>No</b>   | [35,66,101]     |
| <i>Pantherophis alleghaniensis</i> | <b>No</b>  | <b>No</b>   | [102]           |
| <i>Pituophis catenifer</i>         | <b>No</b>  | <b>No</b>   | [103]           |
| <i>Elaphe quadrivirgata</i>        | <b>No</b>  | <b>No</b>   | [96–97,104]     |
| <i>Euprepiophis conspicillatus</i> | <b>No</b>  | <b>No</b>   | [105]           |
| <i>Drymarchon corais</i>           | <b>Yes</b> | <b>Yes</b>  | [106–107]       |
| <i>Coluber constrictor</i>         | <b>No</b>  | <b>No</b>   | [35,66,108–109] |
| <i>Dasypeltis scabra</i>           | <b>No</b>  | <b>No</b>   | [110–111]       |
| <i>Boiga irregularis</i>           | <b>No</b>  | <b>No</b>   | [112]           |
| <i>Lycodon rufozonatus</i>         | <b>Yes</b> | <b>Yes</b>  | [113]           |
| <i>Cyclophiops semicarinatus</i>   | <b>No</b>  | <b>No</b>   | [105]           |
| <i>Dendrelaphis subocularis</i>    | <b>No</b>  | <b>No</b>   | [114–115]       |
| <i>Dendrelaphis punctulatus</i>    | <b>No</b>  | <b>No</b>   | [116–118]       |
| <i>Hemiaspis signata</i>           | <b>No</b>  | <b>No</b>   | [119–121]       |
| <i>Pseudechis australis</i>        | <b>No</b>  | <b>No</b>   | [121]           |
| <i>Acanthophis praelongus</i>      | <b>No</b>  | <b>No</b>   | [122]           |
| <i>Naja nigricollis</i>            | <b>Yes</b> | <b>Yes</b>  | [123]           |
| <i>Naja melanoleuca</i>            | <b>Yes</b> | <b>Yes</b>  | [123–126]       |
| <i>Naja naja</i>                   | <b>Yes</b> | <b>Yes</b>  | [127–128]       |
| <i>Naja atra</i>                   | <b>Yes</b> | <b>Yes</b>  | [127–129]       |
| <i>Hemachatus haemachatus</i>      | <b>Yes</b> | <b>Yes</b>  | [126]           |

|                                |     |     |              |
|--------------------------------|-----|-----|--------------|
| <i>Dendroaspis angusticeps</i> | No  | No  | [130–131]    |
| <i>Dendroaspis polylepis</i>   | No  | No  | [131]        |
| <i>Ophiophagus hannah</i>      | No  | No  | [132]        |
| <i>Boaedon fuliginosus</i>     | No  | No  | [133]        |
| <i>Hypsiscopus plumbea</i>     | No  | No  | [134]        |
| <i>Crotalus atrox</i>          | Yes | No  | [135–137]    |
| <i>Sistrurus catenatus</i>     | No  | No  | [138–140]    |
| <i>Agkistrodon contortrix</i>  | Yes | No  | [66,141–143] |
| <i>Viridovipera stejnegeri</i> | No  | No  | [127,144]    |
| <i>Bitis nasicornis</i>        | Yes | Yes | [124,145]    |
| <i>Bitis arietans</i>          | Yes | Yes | [146]        |
| <i>Cerastes cerastes</i>       | Yes | No  | [147–148]    |
| <i>Causus maculatus</i>        | Yes | Yes | [149]        |
| <i>Vipera berus</i>            | No  | No  | [150–151]    |
| <i>Vipera aspis</i>            | No  | No  | [152–154]    |
| <i>Acrochordus arafurae</i>    | No  | No  | [155–156]    |
| <i>Morelia spilota</i>         | No  | No  | [157–158]    |
| <i>Liasis fuscus</i>           | No  | No  | [159–161]    |
| <i>Python regius</i>           | No  | No  | [162]        |
| <i>Python molurus</i>          | No  | No  | [163–165]    |
| <i>Epictia albipuncta</i>      | Yes | No  | [166–167]    |

---

## References

1. Savage JM. 2002 *The amphibians and reptiles of Costa Rica: a herpetofauna between two continents, between two seas*. University of Chicago press.
2. Guyer C, Donnelly MA. 2005 *Amphibians and reptiles of La Selva, Costa Rica, and the Caribbean Slope: a comprehensive guide*. University of California Press.
3. Oreja Miranda BR. 1966 The snake genus *Lystrophis* in Uruguay. *Copeia* **1966**, 193–205.
4. Cunha ORD, Nascimento FPD. 1975 Ofídios da Amazônia. VII. As serpentes peçonhentas do gênero *Bothrops* (jararacas) e *Lachesis* (surucucu) da região leste do Pará. (Ophidia, Viperidae). *Bol. Mus. Par. Emilio Goeldi* **83**:1–42.
5. Hoogmoed MS. 1980 Notes on the herpetofauna of Surinam: VII. Revision of the genus *Atracus* in Surinam, with the resurrection of two species (Colubridae, Reptilia). *Zool. Verhand.* **175**, 3–47.

6. Marques OAV, Puerto G. 1994 Dieta e comportamento alimentar de *Erythrolamprus aesculapii*, uma serpente ofiófaga. *Rev. Brasil. Biol.* **54**, 253–259.
7. Martins M, Oliveira ME. 1998 Natural history of snakes in forests of the Manaus region, Central Amazonia, Brazil. *Herp. Nat. Hist.* **6**, 78–150.
8. dos Santos-Costa MC, Maschio GF, da Costa Prudente AL. 2015 Natural history of snakes from Floresta Nacional de Caxiuanã, eastern Amazonia, Brazil. *Herp. Not.* **8**, 69–98.
9. Jordão RS. 1996 Estudo comparativo da alimentação de *Waglerophis merremii* e *Xenodon neuwiedii* (Serpentes: Colubridae). M.S. Thesis. *Universidade de São Paulo, Dissertação de Mestrado, São Paulo*.
10. Marques OAV, Eterovic A, Endo W. 2001 Seasonal activity of snakes in the Atlantic forest in southeastern Brazil. *Amphibia-Reptilia* **22**, 103–111.
11. da Silva VX, Rodrigues MT. 2001 *Xenodon neuwiedii* (Quiriripitá). Diet. *Herp. Rev.* **32**, 188.
12. Toledo LF, Ribeiro RS, Haddad CF. 2006 Anurans as prey: an exploratory analysis and size relationships between predators and their prey. *J. Zool.* **271**, 170–177.
13. Vitt LJ. 1983 Ecology of an anuran-eating guild of terrestrial tropical snakes. *Herpetologica* **39**, 52–66.
14. Dixon JR, Soini P. 1986 The reptiles of the Upper Amazon Basin, Iquitos Region, Peru. I Lizards and amphisbaenians. II Crocodylians turtles and snakes. *Milwaukee Public Museum, Milwaukee*.
15. Martins M, Oliveira ME. 1993 The snakes of the genus *Atractus* Wagler (Reptilia: Squamata: Colubridae) from the Manaus region, central Amazonia, Brazil. *Zool. Meded.* **67**, 21–40.
16. Yanosky AA, Dixon JR, Mercolli C. 1996 Ecology of the snake community at El Bagual Ecological Reserve, northeastern Argentina. *Herp. Nat. Hist.* **4**, 97–110.
17. Alencar LR, Gaiarsa MP, Martins M. 2013 The evolution of diet and microhabitat use in Pseudoboine snakes. *S. Amer. J. Herpetol.* **8**, 60–66.
18. Klaczko J, Sherratt E, Setz EZ. 2016 Are diet preferences associated to skulls shape diversification in xenodontine snakes? *Plos One* **11**, e0148375.
19. Pinto RNL, da Silva NJ, Aird SD. 1991 Human envenomation by the South American opisthoglyph *Clelia clelia plumbea* (Wied). *Toxicon* **29**, 1512–1516.

20. López, MS, Giraudo AR. 2004 Diet of the large water snake *Hydrodynastes gigas* (Colubridae) from northeast Argentina. *Amphibia-Reptilia* **25**, 178–184.
21. Beebe W. 1946 Field notes on the snakes of Kartabo, British Guiana, and Caripito, Venezuela. *Zoologica*, **31**, 11–52.
22. Vanzolini PE. 1986 Levantamento herpetológico da área do Estado de Rondônia sob a influência da rodovia Br-364. Polonoreste/Ecologia Animal. Relatório de Pesquisa nº 1, CNPq, Brasília, 50 pp.
23. Cunha O, Nascimento FP. 1993. Ofidios da Amazonia. As cobras da regioao leste do Para. *Bol. Mus. Par. Emilio Goeldi. Ser. Zool.* **9**, 1–191.
24. Silva NJ Jr, Souza IF, Silva WV, Ribeiro RS, Costa MC, Valle NC, Silva H. 2003 *Helicops angulatus* (Water-snake). Diet. *Herp. Rev.* **34**, 68–68.
25. Madrid C, Ruiz PC. 2012 Diet and mortality of the snake *Conophis vittatus* in Western Mexico. *Bol. Asoc. Herpetol. Esp.* **23**, 34–36.
26. Queiroz Alves F, Argôlo AS, Jim J. 2003 *Dipsas catesbyi* (Catesby's Snail-eater) prey. *Herp. Rev.* **34**, 373–374.
27. Bernarde PS, Abe AS. 2010 Hábitos alimentares de serpentes em Espigão do Oeste, Rondônia, Brasil. *Biota Neotrop.* **10**, 1.
28. Russell MJ, Ample M, Strieby A. 1999 *Scinax elaeochroa* (NCN). Predation. *Scinax elaeochroa* (NCN). Depredación. *Herp. Rev.* **30**, 38.
29. McKelvy AD, Figureoa A, Lewis TR. 2013 First record of ophiophagy in the widely distributed snake *Leptodeira septentrionalis* (Kennicott, 1859)(Ophidia, Colubridae). *Herp. Not.* **6**, 177–178.
30. Santos-Silva CR, Andrade IS, Araújo ML, Barros LCS, Gomes L, Ferrari SF. 2014 Predation of six anuran species by the banded cat-eyed snake, *Leptodeira annulata* (Serpentes: Dipsadidae), in the Caatinga scrub of northeastern Bahia, Brazil. *Herp. Not.* **7**, 123–126.
31. Rodríguez Robles JA, Mulcahy DG, Greene HW. 1999 Feeding ecology of the desert nightsnake, *Hypsiglena torquata* (Colubridae). *Copeia*, **1993**, 93–100.
32. Neill WT. 1964 Taxonomy, natural history, and zoogeography of the Rainbow Snake, *Farancia erytrogramma* (Palisot de Beauvois). *Amer. Mid. Nat.* **71**, 257–295.
33. Steen DA, Stevenson DJ, Beane JC, Willson JD, Aresco MJ, Godwin JC, Graham SP, Smith LL, Howze JM, Rudolph DC, Pierce JB. 2013 Terrestrial movements of

the red-bellied mudsnake (*Farancia abacura*) and rainbow snake (*F. erythrogramma*). *Herp. Rev.* **44**, 20–213

34. Bush FM. 1959 Foods of some Kentucky herptiles. *Herpetologica* **15**, 73–77.
35. Fitch HS. 1982 Resources of a snake community in prairie-woodland habitat of northeastern Kansas. Pp. 83–97 in Scott NJ Jr., ed. *Herpetological Communities*. U.S. Fish and Wildlife Service, Wildlife Research Report 13. U.S. Fish and Wildlife Service, Washington, D.C., U.S.A.
36. Cook SF. 1960 On the occurrence and life history of *Contia tenuis*. *Herpetologica* **16**, 163–173.
37. Platt DR. 1969 *Natural history of the hognose snakes, Heterodon platyrhinos and Heterodon nasicus*. University of Kansas Press.
38. Beane JC, Graham SP, Thorp TJ, Pusser LT. 2014 Natural history of the southern hognose snake (*Heterodon simus*) in North Carolina, USA. *Copeia* **2014**, 168–175.
39. Durso AM, Mullin SJ. 2016 Ontogenetic shifts in the diet of plains hog-nosed snakes (*Heterodon nasicus*) revealed by stable isotope analysis. *Zoology* [EARLY VIEW]
40. Edgren RA. 1955 The natural history of the hog-nosed snakes, genus *Heterodon*: a review. *Herpetologica* **11**, 105–117.
41. Cooper WE, Secor S. 2007 Strong response to anuran chemical cues by an extreme dietary specialist, the eastern hog-nosed snake (*Heterodon platyrhinos*). *Can. J. Zool.* **85**, 619–25.
42. Seigel RA. 1984 *The foraging ecology and resource partitioning patterns of two species of garter snakes*. Ph.D. dissertation. University of Kansas, Lawrence.
43. Hart DR. 1979 Niche relationships of *Thamnophis radix haydeni* and *Thamnophis sirtalis parietalis* in the interlake district of Manitoba Canada. *Tulane Stud. Zool. Bot.* **21**, 125–140.
44. Dalrymple GH, Reichenbach NG. 1981 Interactions between the prairie garter snake (*Thamnophis radix*) and the common garter snake (*T. sirtalis*) in Killdeer Plains, Wyandot County, Ohio. *Ohio. Biol. Surv. Biol. Notes* **15**, 244–250.
45. Tuttle KN, Gregory PT. 2009 Food habits of the plains garter snake (*Thamnophis radix*) at the northern limit of its range. *J. Herpetol.* **43**, 65–73.
46. Carpenter CC. 1952 Comparative ecology of the common garter snake (*Thamnophis s. sirtalis*), the ribbon snake (*Thamnophis s. sauritus*), and Butler's garter snake (*Thamnophis butleri*) in mixed populations. *Ecol. Monogr.* **22**, 235–258.



47. Catling PM, Freedman B. 1980 Food and feeding-behavior of sympatric snakes at Amherstburg, Ontario. *Can. Field-Nat.* **94**, 28–33.
48. Asplund KK. 1963 Ecological factors in the distribution of *Thamnophis brachystoma* (Cope). *Herpetologica* **17**, 128–132.
49. Rossman DA. 1996 *The garter snakes: evolution and ecology*. University of Oklahoma Press.
50. Arnold SJ. 1981 Behavioral variation in natural populations. II. The inheritance of a feeding response in crosses between geographic races of the garter snake, *Thamnophis elegans*. *Evolution* **35**, 510–515.
51. Kephart DG, Arnold SJ. 1982 Garter snake diets in a fluctuating environment: a seven-year study. *Ecology* **63**, 1232–1236.
52. Lind AJ, Welsh HH. 1994 Ontogenetic changes in foraging behaviour and habitat use by the Oregon garter snake, *Thamnophis atratus hydrophilus*. *Anim. Behav.* **48**, 1261–1273.
53. Feldman CR, Brodie ED Jr., Pfrender ME. 2009 The evolutionary origins of beneficial alleles during the repeated adaptation of garter snakes to deadly prey. *Proc. Nat. Acad. Sci.* **106**, 13415–12420.
54. Welsh HH Jr, Wheeler CA, Lind AJ. 2010 Spatial ecology of the Oregon gartersnake, *Thamnophis atratus hydrophilus*, in a free-flowing stream environment. *Copeia* **2010**, 75–85.
55. Fitch HS. 1949 Study of snake populations in central California. *Amer. Mid. Nat.* **41**, 513–579.
56. Britt EJ, Bennett AF. 2008 The energetic advantages of slug specialization in garter snakes (genus *Thamnophis*). *Physiol. Biochem. Zool.* **81**, 247–254.
57. Fouquette MJ. 1954 Food competition among four sympatric species of garter snakes, genus *Thamnophis*. *Tex. J. Sci.* **6**, 172–189.
58. Jones KB. 1990 Habitat use and predatory behavior of *Thamnophis cyrtopsis* (Serpentes: Colubridae) in a seasonally variable aquatic environment. *Southwest. Nat.* **35**, 115–122.
59. Conant R. 1963 Semiaquatic snakes of the genus *Thamnophis* from the isolated drainage system of the Rio Nazas and adjacent areas in Mexico. *Copeia* **1963**, 473–499.

60. Drummond H. 1983 Aquatic foraging in garter snakes: a comparison of specialists and generalists. *Behaviour* **86**, 1–30.
61. García CM, Drummond H. 1988 Seasonal and ontogenetic variation in the diet of the Mexican Garter Snake, *Thamnophis eques*, in lake Tecocomulco, Hidalgo. *J. Herpetol.* **22**, 129–134.
62. Drummond H, García CM. 1989 Limitations of a generalist: a field comparison of foraging snakes. *Behaviour* **108**, 23–42.
63. Manjarrez J, García CM, Drummond H. 2013 Variation in the diet of the Mexican black-bellied gartersnake *Thamnophis melanogaster*: importance of prey availability and snake body size. *J. Herpetol.* **47**, 413–420.
64. Rowe JW, Campbell KC, Gillingham JC. 2000 Diet of the ribbon snake on Beaver Island, Michigan: Temporal variation and the relationship of prey size to predator size. *Herp. Nat. Hist.* **7**, 145–152.
65. Clark DR Jr. 1974 The western ribbon snake (*Thamnophis proximus*): ecology of a Texas population. *Herpetologica* **30**, 372–379.
66. Trauth SE. 1995 Vertebrate prey of selected Arkansas snakes. *Proc. Ark. Acad. Sci.* **49**, 188–192.
67. Hampton PM. 2011 Feeding performance in the Western Ribbon Snake (*Thamnophis proximus*): ontogeny and the effects of prey type and size. *Can. J. Zool.* **89**, 945–50.
68. Scudder-Davis RM, Burghardt GM. 1986 Diet and growth in juveniles of the garter snakes *Thamnophis sirtalis infernalis* and *Thamnophis radix radix*. *Growth* **51**, 74–85.
69. Gregory PT, Nelson KJ. 1991 Predation on fish and intersite variation in the diet of common garter snakes, *Thamnophis sirtalis*, on Vancouver Island. *Can. J. Zool.* **69**, 988–94.
70. Burghardt GM, Krause MA. 1999 Plasticity of foraging behavior in garter snakes (*Thamnophis sirtalis*) reared on different diets. *J. Comp. Psych.* **113**, 277–285.
71. Mushinsky HR, Hebrard JJ. 1977 Food partitioning by five species of water snakes in Louisiana. *Herpetologica* **33**, 162–166.
72. Mushinsky HR, Hebrard JJ, Vodopich DS. 1982 Ontogeny of water snake foraging ecology. *Ecology.* **63**, 1624–1629.

73. Miller DE, Mushinsky HR. 1990 Foraging ecology and prey size in the mangrove water snake, *Nerodia fasciata compressicauda*. *Copeia*. **1990**, 1099–1106.
74. Gibbons JW, Dorcas ME. 2004 *North American watersnakes: a natural history*. University of Oklahoma Press.
75. Kofron CP. 1978 Foods and habitats of aquatic snakes (Reptilia, Serpentes) in a Louisiana swamp. *J. Herpetol.* **12**, 543–554.
76. Manjarrez J, García CM. 1991 Feeding ecology of *Nerodia rhombifera* in a Veracruz swamp. *J. Herpetol.* **25**, 499–502.
77. Godley JS, McDiarmid RW, Rojas NN. 1984 Estimating prey size and number in crayfish-eating snakes, genus *Regina*. *Herpetologica*, **40**, 82–88.
78. Jackrel SL, Reinert HK. 2011 Behavioral responses of a dietary specialist, the queen snake (*Regina septemvittata*), to potential chemoattractants released by its prey. *J. Herpetol.* **45**, 272–276.
79. Rossman DA, Myer PA. 1990 Behavioral and morphological adaptations for snail extraction in the North American brown snakes (genus *Storeria*). *J. Herpetol.* **24**, 434–438.
80. do Amaral JPS. 1999 Lip-curling in redbelly snakes (*Storeria occipitomaculata*): functional morphology and ecological significance. *J. Zool.* **248**, 289–293.
81. Judd WW. 1954 Observations on the food of the little brownsnake, *Storeria dekayi*, at London, Ontario. *Copeia* **1954**, 62–64.
82. Godley JS. 1980 Foraging ecology of the striped swamp snake, *Regina alleni*, in southern Florida. *Ecol. Monogr.* **50**, 411–436.
83. Dwyer CM, Kaiser H. 1997 Relationship between skull form and prey selection in the thamnophiine snake genera *Nerodia* and *Regina*. *J. Herpetol.* **31**, 463–475.
84. Franz R. 1977 Observations on the food, feeding behavior, and parasites of the striped swamp snake, *Regina alleni*. *Herpetologica* **33**, 91–94.
85. Madsen T. 1983 Growth rates, maturation and sexual size dimorphism in a population of grass snakes, *Natrix natrix*, in southern Sweden. *Oikos* **40**, 277–282.
86. Filippi E, Capula M, Luiselli L, Agrimi U. 1996 The prey spectrum of *Natrix natrix* (Linnaeus, 1758) and *Natrix tessellata* (Laurenti, 1768) in sympatric populations. *Herpetozoa* **8**, 155–164.

87. Gregory PT, Isaac LA. 2004 Food habits of the grass snake in southeastern England: Is *Natrix natrix* a Generalist Predator? *J. Herpetol.* **38**, 88–95.
88. Luiselli L, Filippi E, Capula M. 2005 Geographic variation in diet composition of the grass snake (*Natrix natrix*) along the mainland and an island of Italy: the effects of habitat type and interference with potential competitors. *Herpetol. J.* **15**, 221–230.
89. Luiselli L, Capizzi D, Filippi E, Anibaldi C, Rugiero L, Capula M. 2007 Comparative diets of three populations of an aquatic snake (*Natrix tessellata*, Colubridae) from Mediterranean streams with different hydric regimes. *Copeia* **2007**, 426–35.
90. Rugiero L, Capula M, Persichetti D, Luiselli L, Angelici FM. 2000 Life-history and diet of two populations of *Natrix maura* (Reptilia, Colubridae) from contrasted habitats in Sardinia. *Misc, Zool.* **23**, 41–51.
91. Santos X, González Solis J, Llorente GA. 2000 Variation in the diet of the viperine snake *Natrix maura* in relation to prey availability. *Ecography* **23**, 185–192.
92. Mao JJ. 2003 Population ecology of genus *Sinonatrix* in Taiwan. PhD dissertation. Trier University. Germany.
93. Khaire A, Khaire N, Katdare M. 1985 Observation on feeding, mating, egg laying, and seasonal moulting of checkered keel back water snake (*Xenochrophis piscator*). *The Snake* **17**, 25–30.
94. Baruah M, Das M, Sengupta S. 2001 Food and feeding of *Amphiesma stolatum* (Linnaeus 1758). *J. Environ. Biol./Acad. Environ. Biol. India* **22**, 315–317.
95. Zhao E. 2005 *Snakes of China. Vol. 1*. Anhui Science and Technology Publishing House.
96. Tanaka K, Ota H. 2002 Natural history of two colubrid snakes, *Elaphe quadrivirgata* and *Rhabdophis tigrinus*, on Yakushima Island, southwestern Japan. *Amphibia-Reptilia* **23**, 323–331.
97. Hirai T. 2004 Dietary shifts of frog eating snakes in response to seasonal changes in prey availability. *J. Herpetol.* **38**, 455–460.
98. Hutchinson DA, Mori A., Savitzky AH, Burghardt GM, Wu X, Meinwald J, Schroeder FC. 2007 Dietary sequestration of defensive steroids in nuchal glands of the Asian snake *Rhabdophis tigrinus*. *Proc. Natl. Acad. Sci. U.S.A.* **104**, 2265–2270.
99. Mohammadi S, Hill JG. 2012 Dietary and behavioral notes on the red-necked keelback (*Rhabdophis subminiatus*) from northeast Thailand. *Trop. Nat. Hist.* **12**, 123–125.

100. Takeuchi H, Mori A. 2012 Antipredator displays and prey chemical preference of an Asian natricine snake, *Macropisthodon rudis* (Squamata: Colubridae). *Curr. Herpetol.* **31**, 47–53.
101. Fitch HS. 1963 Natural history of the black rat snake (*Elaphe o. obsoleta*) in Kansas. *Copeia* **1963**, 649–658.
102. Delaney DK, Pater LL, Carlile LD, Stevenson DJ, Walde AD. 2008 Red-cockaded woodpecker (*Picoides borealis*) response to nest depredation by an Eastern rat snake (*Elaphe alleghaniensis*). *Southeast. Nat.* **7**, 753–759.
103. Rodríguez - Robles JA. 2002 Feeding ecology of North American gopher snakes (*Pituophis catenifer*, Colubridae). *Biol. J. Linn. Soc.* **77**, 165–83.
104. Luiselli L. 2006 Broad geographic, taxonomic and ecological patterns of interpopulation variation in the dietary habits of snakes. *Web Ecol.* **6**, 2–16.
105. Mori A, Moriguchi H. 1988 Food habits of the snakes in Japan: a critical review. *The Snake* **20**, 98–113.
106. Stevenson DJ, Bolt MR, Smith DJ, Enge KM, Hyslop NL, Norton TM, Dyer KJ. 2010 Prey records for the eastern indigo snake (*Drymarchon couperi*). *Southeast. Nat.* **9**, 1–18.
107. da Costa Prudente AL, Menks AC, da Silva FM, Maschio GF. 2014. Diet and reproduction of the Western Indigo Snake *Drymarchon corais* (Serpentes: Colubridae) from the Brazilian Amazon. *Herp. Notes* **7**, 99–108.
108. Brown WS, Parker WS. 1982 Niche dimensions and resource partitioning in a Great Basin desert snake community. In *Herpetological communities*, pp. 59–81. Wildlife Research Report No. 13, US Fish and Wildlife Service USA.
109. Cooper WE, Burghardt GM, Brown WS. 2000 Behavioural responses by hatchling racers (*Coluber constrictor*) from two geographically distinct populations to chemical stimuli from potential prey and predators. *Amphibia-Reptilia* **21**, 103–115.
110. Großmann J, Starck JM. 2006 Postprandial responses in the African rhombig egg eater (*Dasypeltis scabra*). *Zoology* **109**, 310–317.
111. Gartner G, Greene HW. 2008 Adaptation in the African egg-eating snake: a comparative approach to a classic study in evolutionary functional morphology. *J Zool.* **275**, 368–374.
112. Savidge JA. 1988 Food habits of *Boiga irregularis*, an introduced predator on Guam. *J. Herpetol.* **22**, 275–282.

113. Kidera N, Ota H. 2008 Can exotic toad toxins kill native Ryukyu snakes? Experimental and field observations on the effects of *Bufo marinus* toxins on *Dinodon rufozonatum walli*. *Curr. Herpetol.* **27**, 23–27.
114. Deuve J. 1970 *Serpents du Laos*. Office de la Recherche Scientifique et Technique Outre-Mer.
115. Saint Girons H. 1972. Les Serpents du Cambodge. *Mém. Mus. Natn. Hist. Nat., (Nouv. sér.), (A, Zool.)* **74**, 1–170, pls. 1–42.
116. Shine R. 1991 Strangers in a strange land: ecology of the Australian colubrid snakes. *Copeia* **1991**, 120–131.
117. Phillips BL, Shine R. 2004 Adapting to an invasive species: toxic cane toads induce morphological change in Australian snakes. *Proc. Natl. Acad. Sci. U.S.A.* **101**, 17150–17155.
118. Fearn S, Trembath DF. 2011 Natural history of the common tree snake, *Dendrelaphis punctulatus* (Serpentes: Colubridae), in the wet–dry tropics of north Queensland. *Aust. J. Zool.* **58**, 384–389.
119. Shine, R. 1977 Habitats, diets, and sympatry in snakes: a study from Australia. *Can. J. Zool.* **55**, 1118–1128.
120. Shine R. 1987 Food habits and reproductive biology of Australian snakes of the genus *Hemiaspis* (Elapidae). *J. Herpetol.* **21**, 71–74.
121. Phillips BL, Brown GP, Shine R. 2003 Assessing the potential impact of cane toads on Australian snakes. *Conserv. Biol.* **17**, 1738–1747.
122. Shine R. 1980 Ecology of the Australian death adder *Acanthophis antarcticus* (Elapidae): evidence for convergence with the Viperidae. *Herpetologica* **36**, 281–289.
123. Luiselli L, Angelici FM. 2000 Ecological relationships in two Afrotropical cobra species (*Naja melanoleuca* and *Naja nigricollis*). *Can. J. Zool.* **78**, 191–198.
124. Luiselli L, Akani GC, Capizzi D. 1998 Food resource partitioning of a community of snakes in a swamp rainforest of south-eastern Nigeria. *J. Zool.* **246**, 125–133.
125. Luiselli L, Angelici FM, Akani GC. 2002 Comparative feeding strategies and dietary plasticity of the sympatric cobras *Naja melanoleuca* and *Naja nigricollis* in three diverging Afrotropical habitats. *Can. J. Zool.* **80**, 55–63.

126. Shine R, Branch WR, Webb JK, Harlow PS, Shine T, Keogh JS. 2007 Ecology of cobras from southern Africa. *J. Zool.* **272**, 183–193.
127. Mao S-H. 1970 Food of the common venomous snakes of Taiwan. *Herpetologica* **26**, 45–48.
128. Ji X, Du WG. 2001 Effects of thermal and hydric environments on incubating eggs and hatchling traits in the cobra, *Naja naja atra*. *J. Herpetol.* **31**, 186–194.
129. Hwang MH, Ho SS, Chou SA, Hsieh TT. 1965 Feeding habits of snakes from Chekiang. *Acta Zool. Sinica* **17**, 37–46.
130. Lloyd CN. 1974 Feeding behaviour in the green mamba, *Dendroaspis angusticeps* (A. Smith). *J. Herpetol. Assoc. Africa* **12**, 12–16.
131. Branch WR, Haagner GV, Shine R. 1995 Is there an ontogenetic shift in mamba diet? Taxonomic confusion and dietary records for black and green mambas (*Dendroaspis*: Elapidae). *Herpetol. Nat. Hist.* **3**, 171–178.
132. Greene HW. 1976 Scale overlap, a directional sign stimulus for prey ingestion by ophiophagous snakes *Ethology* **41**, 113–120.
133. Akani GC, Luiselli L, Eniang EA, Rugiero L. 2008 Life in the tropical suburbs: Food type partitioning among sympatric African house snakes of the genus *Lamprophis* (Colubridae). *Ital. J. Zool.* **75**, 395–399.
134. Voris HK, Murphy JC. 2002 The prey and predators of homalopsine snakes. *J. Nat. His.* **36**, 1621–1632.
135. Beavers RA. 1976 Food habits of the western diamondback rattlesnake, *Crotalus atrox*, in Texas (Viperidae). *Southwest. Nat.* **20**, 503–515.
136. Reynolds RP, Scott NJ Jr. 1982 Use of a mammalian resource by a Chihuahuan snake community. In: Scott NJ Jr, ed. *Herpetological communities*. Washington, DC: United States Department of the Interior, 99–118.
137. Ernst CH. 1992 *Venomous reptiles of North America*. Smithsonian Institution Press.
138. Keenlyne KD, Beer JR. 1973 Food habits of *Sistrurus catenatus catenatus*. *J. Herpetol.* **7**, 382–384.
139. Holycross AT, Mackessy SP. 2002 Variation in the diet of *Sistrurus catenatus* (Massasauga), with emphasis on *Sistrurus catenatus edwardsii* (Desert Massasauga). *J. Herpetol.* **36**, 454–464.

140. Weatherhead PJ, Knox JM, Harvey DS, Wynn D, Chiucchi J, Gibbs HL. 2009 Diet of *Sistrurus catenatus* in Ontario and Ohio: effects of body size and habitat. *J. Herpetol.* **43**, 693–697.
141. Swanson PL. 1946 Effects of snake venoms on snakes. *Copeia* **1946**, 242–249.
142. Fitch HS. 1960 *Autecology of the copperhead*. University of Kansas Press.
143. Savage T. 1967 The diet of rattlesnakes and copperheads in the Great Smoky Mountains National Park. *Copeia* **1967**, 226–227.
144. Creer S, Chou W-H, Malhotra A, Thorpe RS. 2002 Offshore insular variation in the diet of the Taiwanese bamboo viper *Trimeresurus stejnegeri* (Schmidt). *Zool. Sci.* **19**, 907–913.
145. Luiselli LM, Akani GC. 2003 Diet of sympatric Gaboon Vipers (*Bitis gabonica*) and Nose-horned Vipers (*Bitis nasicornis*) in southern Nigeria. *Afr. J. Herpetol.* **52**, 101–106.
146. Masood MF. 2012 Ecological distribution of snakes' fauna of Jazan region of Saudi Arabia. *Egypt. Acad. J. Biolog. Sci.*, **4**, 183–197
147. Secor SM, Nagy KA. 1994 Bioenergetic correlates of foraging mode for the snakes *Crotalus cerastes* and *Masticophis flagellum*. *Ecology* **75**, 1600–1614.
148. Al-Sadoon MK, Paray BA. 2016 Ecological aspects of the horned viper, *Cerastes cerastes gasperettii* in the central region of Saudi Arabia. *Saudi J. Biol. Sci.* **23**, 135–138.
149. Luiselli LM, Akani GC, Angelici FM, Politano E, Ude L, Wariboko S.M. 2004 Aspects of the ecology of a population of *Causus maculatus* (Reptilia: Viperidae) from southern Nigeria. *Amphibia-Reptilia* **25**, 99–111.
150. Luiselli LM, Agrimi U. 1991 Composition and variation of the diet of *Vipera aspis francisciredi* in relation to age and reproductive stage. *Amphibia-Reptilia* **12**, 137–144.
151. Monney J-C. 1996 Biologie comparée de *Vipera aspis* L. et de *Vipera berus* L. (Reptilia, Ophidia, Viperidae) dans une station des Preâlpes bernoises. PhD dissertation, University of Neuchâtel, Neuchâtel, Switzerland, 174 pp.
152. Pielowski, Z. 1962 Untersuchungen über die Ökologie der Kreuzotter (*Vipera berus* L.). *Zool. Jb. Syst* **89**, 479–500.
153. Luiselli LM, Anibaldi C. 1991 The diet of the adder (*Vipera berus*) in two alpine environments. *Amphibia-Reptilia* **12**, 214–217.



154. Drobenkov SM. 1995 Comparative analysis of the feeding of sympatric snakes *Vipera berus* (L), *Natrix natrix* (L), and *Coronella austriaca* (Laur). *Russ. J. Ecol.* **26**, 197–201.
155. Shine R. 1986 Sexual differences in morphology and niche utilization in an aquatic snake, *Acrochordus arafurae*. *Oecologia* **69**, 260–267.
156. Vincent SE, Shine R, Brown GP. 2005 Does foraging mode influence sensory modalities for prey detection in male and female file snakes, *Acrochordus arafurae*? *Anim. Behav.* **70**, 715–721.
157. Slip DJ, Shine R. 1988 Feeding habits of the diamond python, *Morelia s. spilota*: ambush predation by a boid snake. *J. Herpetol.* **22**, 323–330.
158. Pearson, D, Shine R, How R. 2002 Sex-specific niche partitioning and sexual size dimorphism in Australian pythons (*Morelia spilota imbricata*). *Biol. J. Linn. Soc.* **77**, 113–125.
159. Shine R, Madsen T. 1997 Prey abundance and predator reproduction: rats and pythons on a tropical Australian floodplain. *Ecology* **78**, 1078–1086.
160. Madsen T, Shine R. 2000 Silver spoons and snake body sizes: prey availability early in life influences long-term growth rates of free-ranging pythons. *J. Anim. Ecol.* **69**, 952–958.
161. Madsen T, Ujvari B, Shine R, Olsson M. 2006 Rain, rats and pythons: Climate-driven population dynamics of predators and prey in tropical Australia. *Aus. Ecol.* **31**, 30–37.
162. Luiselli LM, Angelici FM. 1998 Sexual size dimorphism and natural history traits are correlated with intersexual dietary divergence in royal pythons (*Python regius*) from the rainforests of southeastern Nigeria. *Ital. J. Zool.* **65**, 183–185.
163. Snow RW, Brien ML, Cherkiss MS, Wilkins L, Mazzotti FJ. 2007 Dietary habits of the Burmese python, *Python molurus bivittatus*, in Everglades National Park, Florida. *Herpetol. Bull.* **101**, 5–7.
164. Dove CJ, Snow RW, Rochford MR, Mazzotti FJ. 2011 Birds consumed by the invasive Burmese python (*Python molurus bivittatus*) in Everglades National Park, Florida, USA. *Wils. J. Ornithol.* **123**, 126–131.
165. Dorcas ME, Willson JD, Reed RN, Snow RW, Rochford MR, Miller MA, Meshaka WE, Andreadis PT, Mazzotti FJ, Romagosa CM, Hart KM. 2012 Severe mammal declines coincide with proliferation of invasive Burmese pythons in Everglades National Park. *Proc. Natl. Acad. Sci. U.S.A.* **109**, 2418–2422.

166. Wehekind L. 1955 Notes on the foods of the Trinidad snakes. *J. Herpetol.* **2**, 9–13.
167. Punzo F. 1974 Comparative analysis of the feeding habits of two species of Arizona blind snakes, *Leptotyphlops h. humilis* and *Leptotyphlops d. dulcis*. *J. Herpetol.* **8**, 153–156.
